# Supplementary material
Source: publisher site journal article supplement (https://www.dovepress.com/article/250191)
Supplement: Supplementary file 1 [file get_supplementary_file.php]

### Table S1. Defining Characteristics of Debility in the SPIROMICS Cohort

| Phenotypic Characteristic | Measure | Range | MCID | Units | Ref | Expected Normal Value | Criterion for being Disabled | Group Mean (SD) | Weight | |
| --- | --- | --- | --- | --- | --- | --- | --- | --- | --- | --- |
| Breathlessness | mMRC | 0-4 | 1 |  | 1 | 0 | ≥3 | 1.02 (0.96) | -0.384 | |
| Self-reported aerobic capacity | VSAQ |  | 1 | (METs) | 2 | >8 | <5 | 5.56 (2.89) | 0.381 | |
| Functional exercise capacity | 6MWD | 0-600 | 28 | (m) | 3 | 500 | <250 | 412.6 (121.4) | 0.259 | |
| Physical health status | SGRQ(a) | 0-60 | 4 |  | 4 | <20 | >60 | 43.4 (25.6) | -0.446 | |
| Disease specific health status | CAT | 0-40 | 1.6 |  | 5 | <10 | >20 | 13.3 (8.3) | -0.406 | |
| Fatigue | FACIT-F | 0-52 | 10 |  | 6,7 | >40 | <50 | 81.6 (19.3) | +0.386 | |
| General health status | SF-12(p) | 0-100 | 2.5 |  | 8,9 | >80 | <20 | 36.3 (15.3) | +0.356 | |
| We classified debility as those individuals with ≥4 disability criteria. MCID=minimum clinically important difference, mMRC=modified Medical Research Council scale for breathlessness, VSAQ=Veterans Specific Activity Questionnaire, METs=metabolic equivalents (oxygen uptake of 3.5 ml/kg/min), 6MWD=6-minute walking distance, SGRQ(a)=St George's Respiratory Questionnaire activity score, CATscore=COPD Assessment Test, FACIT-F=FACT Clinical Trials score, SF-12(p)=physical component of the Short Form 12 health status instrument. The weights are the coordinates of the first eigenvector from the principal component analysis, which we have called ‘disability score.’ | | | | | | | | | |

References Used to Derive MCID and Criterion for being Disabled

1. Bestall JC, Paul EA, Garrod R, Garnham R, Jones PW, Wedzicha JA. Usefulness of the Medical Research Council (MRC) dyspnoea scale as a measure of disability in patients with chronic obstructive pulmonary disease. Thorax 1999;54:581-6.

2. Myers J, Do D, Herbert W, Ribisl P, Froelicher VF. A nomogram to predict exercise capacity from a specific activity questionnaire and clinical data. Am J Cardiol 1994;73:591-6.

3. Puhan MA, Chandra D, Mosenifar Z, et al. The minimal important difference of exercise tests in severe COPD. Eur Respir J 2011;37:784-90.

4. Jones PW. St. George's Respiratory Questionnaire: MCID. COPD 2005;2:75-9.

5. Kon SS, Canavan JL, Jones SE, et al. Minimum clinically important difference for the COPD Assessment Test: a prospective analysis. Lancet Respir Med 2014;2:195-203.

6. Nordin A, Taft C, Lundgren-Nilsson A, Dencker A. Minimal important differences for fatigue patient reported outcome measures-a systematic review. BMC Med Res Methodol 2016;16:62.

7. Cella D, Eton DT, Lai JS, Peterman AH, Merkel DE. Combining anchor and distribution-based methods to derive minimal clinically important differences on the Functional Assessment of Cancer Therapy (FACT) anemia and fatigue scales. J Pain Symptom Manage 2002;24:547-61.

8. Alonso J, Ferrer M, Gandek B, et al. Health-related quality of life associated with chronic conditions in eight countries: results from the International Quality of Life Assessment (IQOLA) Project. Qual Life Res 2004;13:283-98.

9. Alma H, de Jong C, Tsiligianni I, Sanderman R, Kocks J, van der Molen T. Clinically relevant differences in COPD health status: systematic review and triangulation. Eur Respir J 2018;52.

**Table S2. Clinical Characteristics of Never Smokers and GOLD Stage 0 Subjects with and without Respiratory Disability**

|  | **With Disability (n= 41)** | **Without Disability (n=828)** | **P-value** |
| --- | --- | --- | --- |
| Age (years) | 55.7 (8.6) | 60.0 (9.9) | 0.006 |
| Sex (n, % within category) |  |  | 0.032* |
| Men | 12 (29%) | 384 (46%) |  |
| Women | 29 (71%) | 444 (54%) |  |
| Race (% within category) |  |  | 0.040* |
| White | 22 (54%) | 571 (69%) |  |
| Non-white | 19 (46%) | 257 (31%) |  |
| BMI (kg/m2) | 31.6 (5.6) | 29.0 (5.0) | 0.001 |
| FEV1 (L) | 2.51 (0.62) | 2.80 (0.72) | 0.011 |
| FEV1 (% predicted) | 91.8 (15.0) | 97.5 (13.0) | 0.006 |
| Exacerbation history (n, % within category) |  |  | 0.002 |
| None in previous year | 35 (85%) | 795 (96%) |  |
| 1 exacerbation | 3 (7%) | 22 (3%) |  |
| ≥2 exacerbations | 3 (7%) | 11 (1%) |  |
| Air Trapping -856 HU (%) | 6.0 (6.1) | 7.8 (9.5) | 0.081 |
| Emphysema <-950 HU (%) | 1.4 (2.5) | 1.6 (1.9) | 0.545 |
| Pi10 Whole Tree (mm) | 3.72 (0.07) | 3.69 (0.08) | 0.087 |
| Average Pi10 of 5 paths (mm) | 3.73 (0.08) | 3.70 (0.09) | 0.036 |
| WBC (cells/mcL) | 7.5 (2.4) | 6.6 (2.0) | 0.004 |
| CRP (mcg/mL) | 8.8 (7.5) | 5.7 (12.5) | 0.074 |
| Fibrinogen (mg/mL) | 5.1 (1.1) | 5.1 (1.4) | 0.837 |
| SERPINA1 (mg/mL) | 1.9 (0.3) | 1.9 (0.5) | 0.800 |
| IL-8 (pg/mL) | 8.2 (4.9) | 8.6 (7.4) | 0.703 |
| IL-6 (pg/mL) | 2.8 (4.5) | 4.2 (14.6) | 0.125 |
| sRAGE (ng/mL) | 2.9 (3.0) | 3.4 (2.5) | 0.338 |
| GDF-15 (ng/L) | 351 (117) | 343 (175) | 0.665 |

Values are Mean (SD)

Respiratory disability is defined as having ≥4 disabled characteristics (see methods). *Chi-squared tests showing significant associations between disability and both sex and race. BMI=body mass index, FEV1=forced expiratory volume in one second, GOLD=Global Initiative for Obstructive Lung Disease, HU=Hounsfield Units, Pi10= square root of the wall area for a “theoretical airway” with an internal perimeter of 10 mm, WBC=white blood cell count, CRP=C-reactive protein, SERPINA1=serpin family A, member 1 gene, IL-8=interleukin 8, IL-6=interleukin 6, sRAGE=soluble receptor for advanced glycation end products, GDF-15= growth differentiation factor-15.

**Table S3. Clinical Characteristics of GOLD Stages 1 and 2 Subjects with and without Respiratory Disability**

|  | **With Disability (n= 111)** | **Without Disability (n=880)** | **P-value** |
| --- | --- | --- | --- |
| Age (years) | 60.1 (9.0) | 66.2 (7.9) | <0.001 |
| Sex (n, % within category) |  |  | <0.001* |
| Men | 47 (42%) | 529 (60%) |  |
| Women | 64 (58%) | 351 (40%) |  |
| Race (% within category) |  |  | <0.001* |
| White | 76 (68%) | 747 (85%) |  |
| Non-white | 35 (32%) | 133 (15%) |  |
| BMI (kg/m2) | 28.9 (6.5) | 27.6 (5.0) | 0.050 |
| FEV1 (L) | 1.91 (0.64) | 2.15 (0.66) | <0.001 |
| FEV1 (% predicted) | 68.2 (13.6) | 75.0 (15.8) | <0.001 |
| Exacerbation history (n, % within category) |  |  | <0.001 |
| None in previous year | 88 (79%) | 802 (91%) |  |
| 1 exacerbation | 13 (12%) | 62 (7%) |  |
| ≥2 exacerbations | 10 (9%) | 16 (2%) |  |
| Air Trapping -856 HU (%) | 20.7 (15.4) | 24.6 (15.7) | 0.015 |
| Emphysema <-950 HU (%) | 5.1 (5.5) | 7.0 (7.4) | 0.001 |
| Pi10 Whole Tree (mm) | 3.73 (0.09) | 3.70 (0.08) | <0.001 |
| Average Pi10 of 5 paths (mm) | 3.75 (0.11) | 3.71 (0.10) | 0.001 |
| WBC (cells/mcL) | 7.5 (2.4) | 7.1 (1.9) | 0.082 |
| CRP (mcg/mL) | 9.5 (13.2) | 5.1 (8.0) | 0.015 |
| Fibrinogen (mg/mL) | 5.5 (1.6) | 5.2 (1.4) | 0.208 |
| SERPINA1 (mg/mL) | 2.0 (0.5) | 2.0 (0.5) | 0.978 |
| IL-8 (pg/mL) | 11.6 (9.3) | 9.9 (14.3) | 0.195 |
| IL-6 (pg/mL) | 3.9 (9.7) | 3.7 (15.7) | 0.868 |
| sRAGE (ng/mL) | 2.8 (1.8) | 3.1 (2.3) | 0.219 |
| GDF-15 (ng/L) | 384 (171) | 387 (179) | 0.878 |

Values are Mean (SD)

Respiratory disability is defined as having ≥4 disabled characteristics (see methods). *Chi-squared tests showing significant associations between disability and both sex and race. BMI=body mass index, FEV1=forced expiratory volume in one second, GOLD=Global Initiative for Obstructive Lung Disease, HU=Hounsfield Units, Pi10= square root of the wall area for a “theoretical airway” with an internal perimeter of 10 mm, WBC=white blood cell count, CRP=C-reactive protein, SERPINA1=serpin family A, member 1 gene, IL-8=interleukin 8, IL-6=interleukin 6, sRAGE=soluble receptor for advanced glycation end products, GDF-15= growth differentiation factor-15.

**Table S4. Clinical Characteristics of GOLD Stages 3 and 4 Subjects with and without Respiratory Disability**

|  | **With Disability (n= 163)** | **Without Disability (n=390)** | **P-value** |
| --- | --- | --- | --- |
| Age (years) | 62.3 (7.2) | 65.8 (7.4) | <0.001 |
| Sex (n, % within category) |  |  | 0.808* |
| Men | 92 (56%) | 178 (58%) |  |
| Women | 71 (44%) | 131 (42%) |  |
| Race (% within category) |  |  | 0.419* |
| White | 129 (79%) | 254 (82%) |  |
| Non-white | 34 (21%) | 55 (18%) |  |
| BMI (kg/m2) | 26.4 (5.7) | 26.4 (7.8) | 0.959 |
| FEV1 (L) | 0.91 (0.32) | 1.09 (0.33) | <0.001 |
| FEV1 (% predicted) | 31.6 (9.3) | 38.4 (7.8) | <0.001 |
| Exacerbation history (n, % within category) |  |  | <0.001 |
| None in previous year | 104 (64%) | 255 (83%) |  |
| 1 exacerbation | 31 (19%) | 41 (13%) |  |
| ≥2 exacerbations | 28 (17%) | 13 (4%) |  |
| Air Trapping -856 HU (%) | 55.8 (15.7) | 50.0 (16.7) | <0.001 |
| Emphysema <-950 HU (%) | 21.7 (12.4) | 18.9 (12.5) | 0.018 |
| Pi10 Whole Tree (mm) | 3.73 (0.08) | 3.73 (0.08) | 0.973 |
| Average Pi10 of 5 paths (mm) | 3.75 (0.11) | 3.75 (0.10) | 0.921 |
| WBC (cells/mcL) | 7.8 (2.5) | 7.4 (2.2) | 0.181 |
| CRP (mcg/mL) | 8.1 (7.5) | 7.2 (12.4) | 0.437 |
| Fibrinogen (mg/mL) | 6.0 (1.6) | 5.5 (1.4) | 0.009 |
| SERPINA1 (mg/mL) | 2.0 (0.7) | 1.9 (0.5) | 0.312 |
| IL-8 (pg/mL) | 9.5 (7.8) | 9.3 (6.8) | 0.899 |
| IL-6 (pg/mL) | 2.1 (7.4) | 4.2 (18.6) | 0.098 |
| sRAGE (ng/mL) | 2.2 (2.0) | 2.6 (2.4) | 0.174 |
| GDF-15 (ng/L) | 349 (153) | 380 (175) | 0.061 |

Values are Mean (SD)

Respiratory disability is defined as having ≥4 disabled characteristics (see methods). *Chi-squared tests showing significant associations between disability and both sex and race. BMI=body mass index, FEV1=forced expiratory volume in one second, GOLD=Global Initiative for Obstructive Lung Disease, HU=Hounsfield Units, Pi10= square root of the wall area for a “theoretical airway” with an internal perimeter of 10 mm, WBC=white blood cell count, CRP=C-reactive protein, SERPINA1=serpin family A, member 1 gene, IL-8=interleukin 8, IL-6=interleukin 6, sRAGE=soluble receptor for advanced glycation end products, GDF-15= growth differentiation factor-15.

Table S5. Estimates of Model for Exacerbation Rate using Zero-Inflated Poisson Regression and Presence of ≥4 Disability Characteristics

Table S6. Estimates of Model for Exacerbation Rate using Zero-Inflated Poisson Regression and Respiratory Disability Score as a Continuous Variable

### Figure S1. Study Participant Flow Diagram


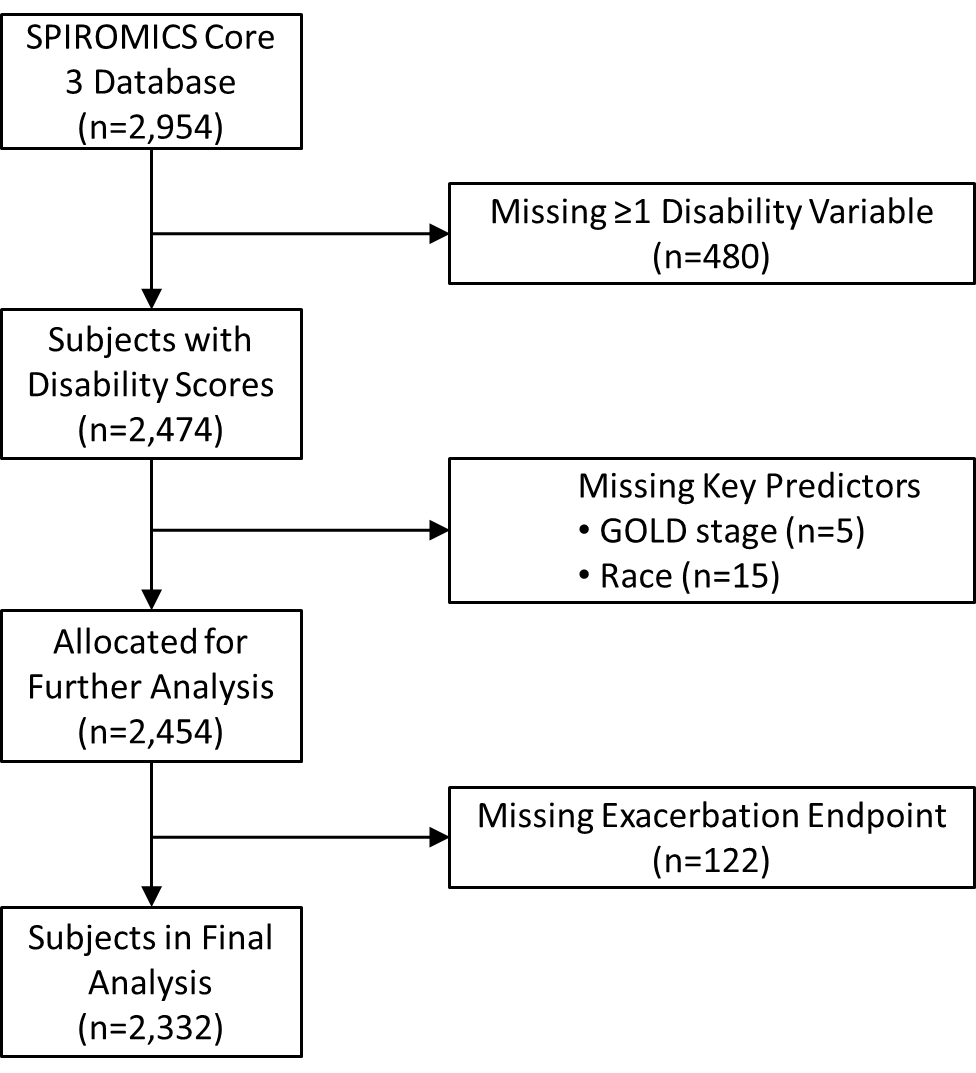


Figure S1. Study participant flow diagram showing reasons why some participants were excluded because of having missing data.
